# Supplementary material for: A nano-Si/FeSi2Ti hetero-structure with structural stability for highly reversible lithium storage
Source: Royal Society of Chemistry journal article supplement (doi:10.1039/c3nr04954j), 2013-11-07
Supplement: c3nr04954j.pdf [file c3nr04954j.pdf]

# Supplementary Information

## **Nano-Si/FeSi<sub>2</sub>Ti hetero-structure with structural stability for highly reversible lithium storage**

Mi Ru Jo,<sup>a</sup> Yoon-Uk Heo,<sup>b</sup> Yoon Cheol Lee<sup>a</sup> and Yong-Mook Kang<sup>a\*</sup>

<sup>a</sup> Department of Energy and Materials Engineering, Dongguk University-Seoul, 100-715 Seoul, Republic of Korea

<sup>b</sup> Research Facility center, Graduate Institute of Ferrous Technology Pohang University of Science and Technology, Pohang, Kyungbuk 790-784, Republic of Korea.

\* Corresponding authors: [dake1234@dongguk.edu](mailto:dake1234@dongguk.edu)

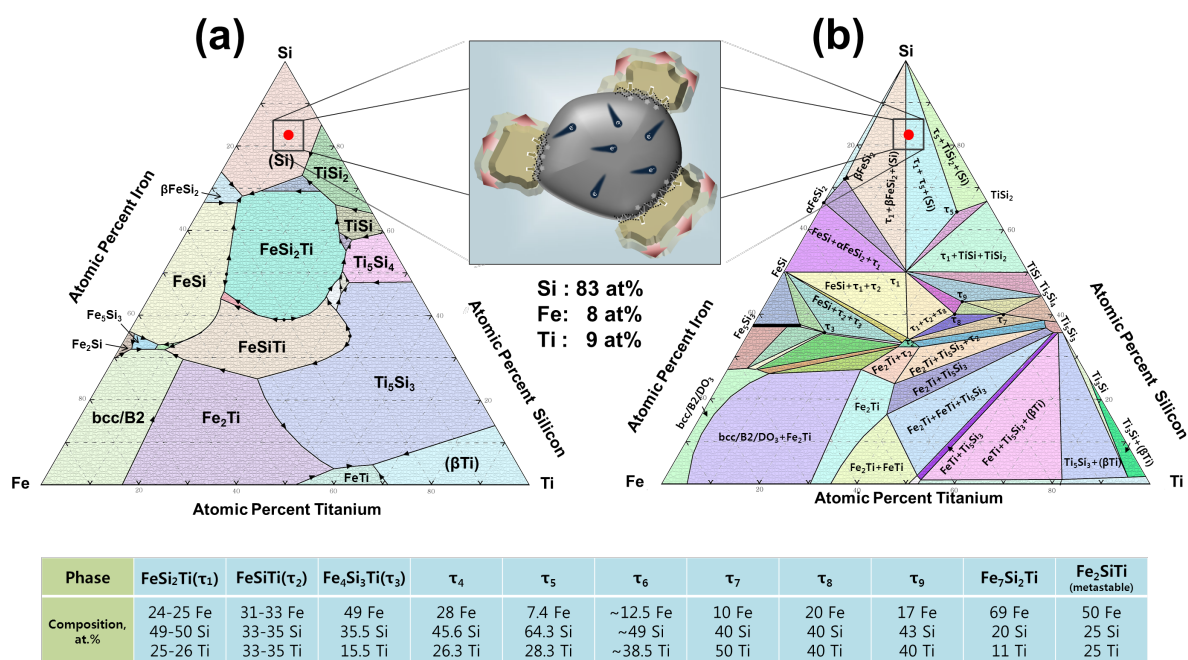

**Fig. S1** Ternary system of (a) Fe-Si-Ti liquidus projection and (b) Fe-Si-Ti tentative isothermal section at 900°C.

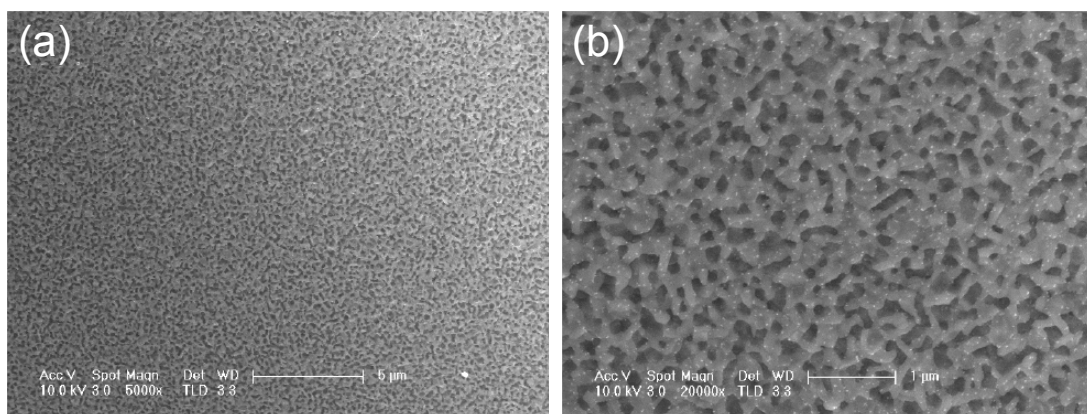

**Fig. S2** SEM image of Melt-spun Si-Ti-Fe alloy ribbons before grinding; (a)  $\times 5,000$ , (b)  $\times 20,000$ .

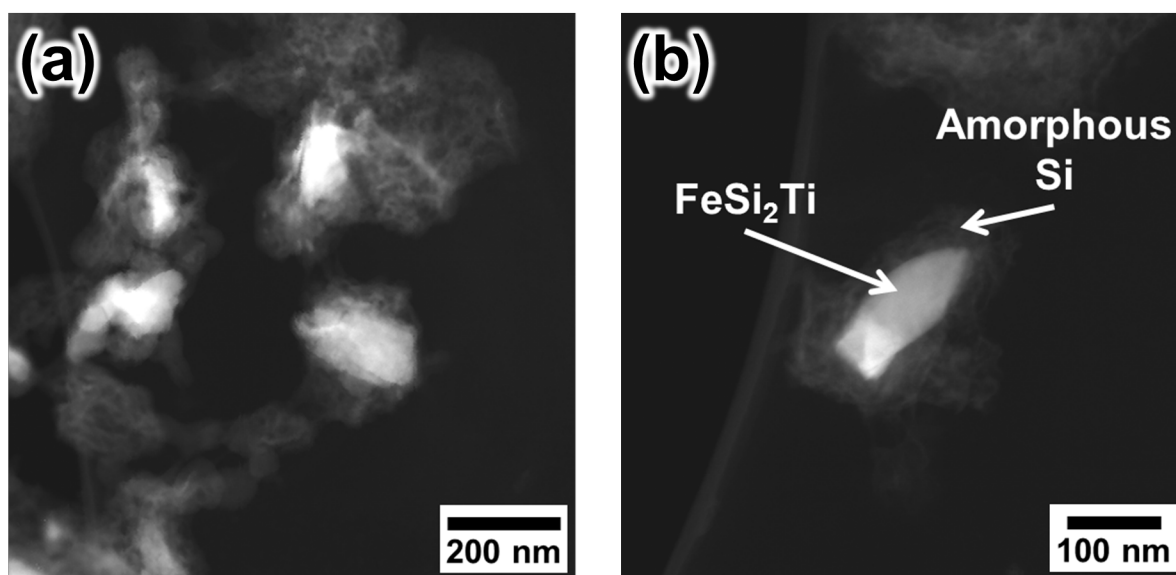

**Fig. S3** STEM images of Nano-Si/FeSi<sub>2</sub>Ti hetero-structure after 50<sup>th</sup> cycles.

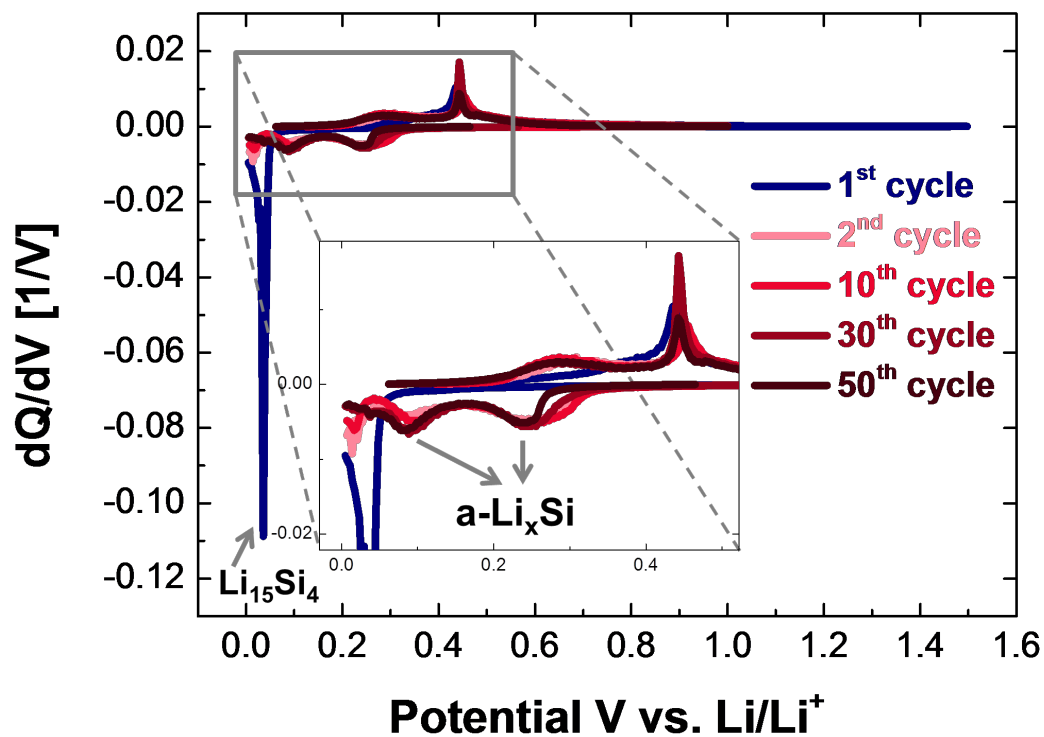

**Fig. S4** The differential capacity plots of Nano-Si/FeSi<sub>2</sub>Ti hetero-structure at 1, 2, 30 and 50<sup>th</sup> cycle.

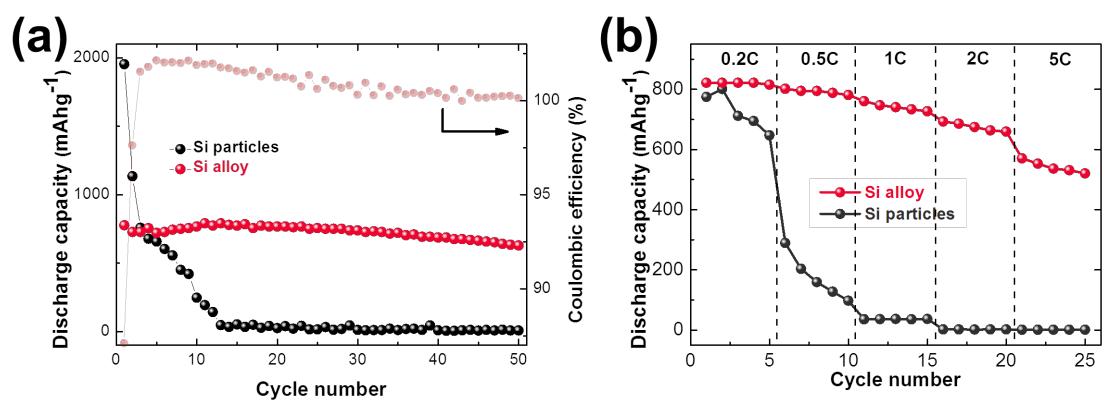

**Fig. S5** The electrochemical performance of Si nanoparticles and Nano-Si/FeSi<sub>2</sub>Ti heterostructure: (a) the cyclic performance at 0.1C, (c) capacity retention amounts when conducting charge-discharge cycles at various current rates.
